# Supplementary material for: Survival Motor Neuron Protein Participates in Mouse Germ Cell Development and Spermatogonium Maintenance
Source: PubMed Central journal article supplement (PMC7037566; doi:10.3390/ijms21030794), 2020-01-25
Supplement: ijms-21-00794-s001.pdf [file ijms-21-00794-s001.pdf]

1 **SUPPLEMENTAL INFORMATION**

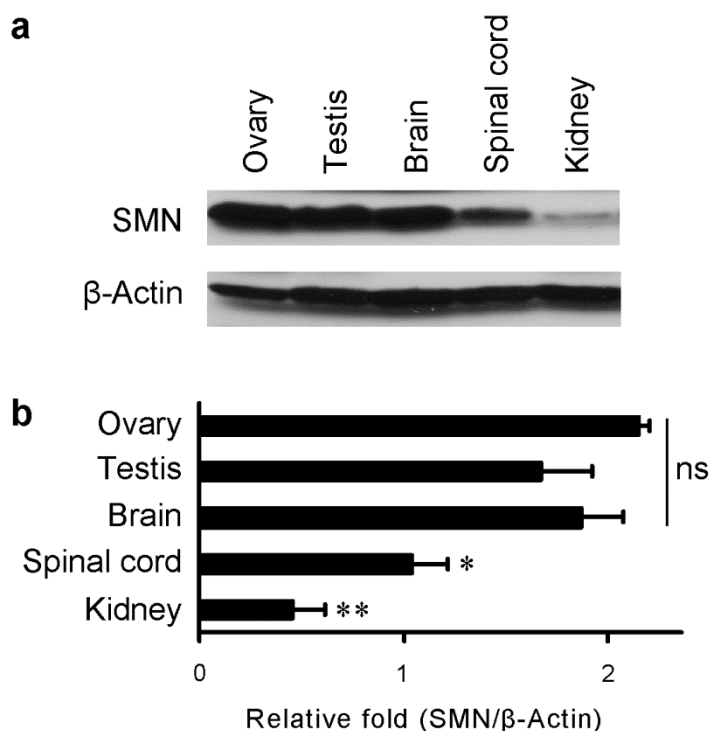

2

3 **Supplementary Figure S1. SMN expression profiles in different adult mice**

4 **tissues.** (A) Western blot of SMN expression in testis, ovary, brain, spinal cord and

5 kidney;  $\beta$ -Actin serves as the internal loading control (n = 3 mice per organ). (B)

6 Quantification of SMN expression in adult mice tissues. SMN expression is

7 normalized to the  $\beta$ -Actin expression level. SMN protein shows high level in the

8 ovary, testis and brain, and slightly low level in the spinal cord and kidney. \*,

9 indicates significance ( $p < 0.05$ ); ns, indicates no significance.

10

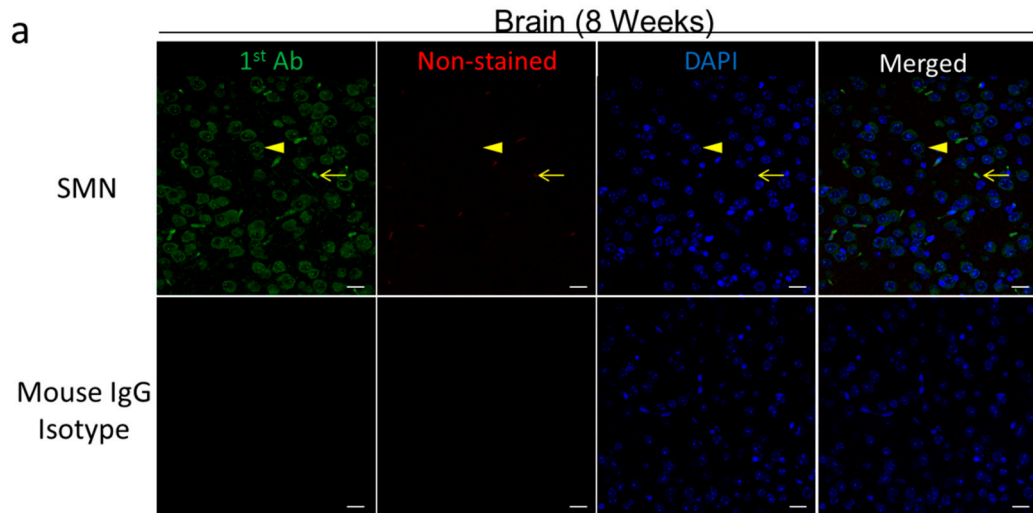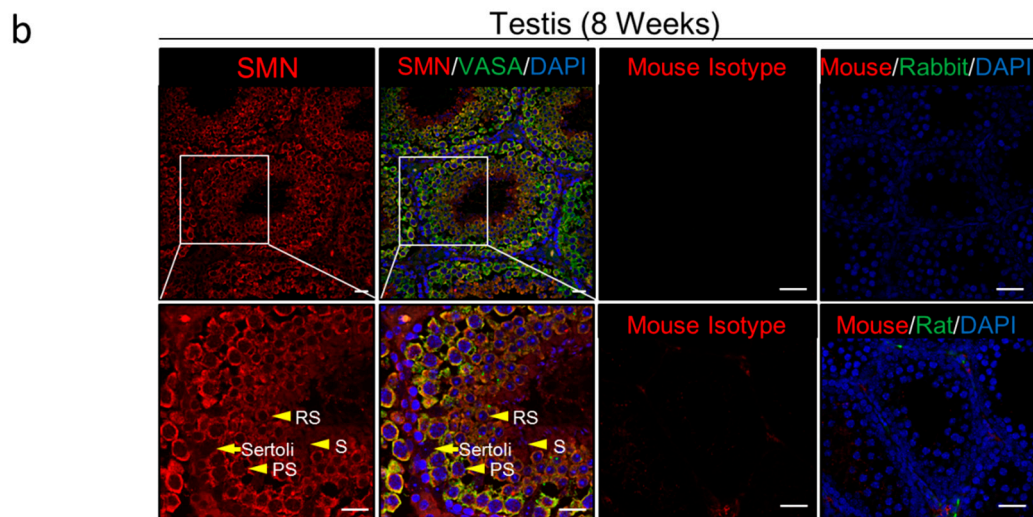

Scale bar=20 μm

11

12 **Supplementary Figure S2. Specificity of SMN antibody confirmed in mouse**

13 **brain section and testis.** (A) In 8 weeks old mouse brain, SMN protein is detectable

14 by mouse anti-SMN antibody. For negative control, mouse isotype IgG and rat

15 isotype IgG 2<sup>nd</sup> antibodies conjugated with 488 fluorescent dye is used. There is many

16 SMN positive cells in the brain section (green color, arrow head), and some

17 autofluorescence that can be observed in intracellular region in both 488 and 546

18 channels (green and red color, arrow indicated). (B) In the testes from 8 weeks old

19 adult mice, cells doubly stained with SMN (red) and germ cell-specific markers,

20 VASA, show colocalization in lower and larger magnification (arrowhead) by IHC  
21 staining. Sertoli cells (arrow indicated) expresses background level of SMN. RS:  
22 round spermatid. S: sperm. PS: pachytene stage spermatocytes.

23

24

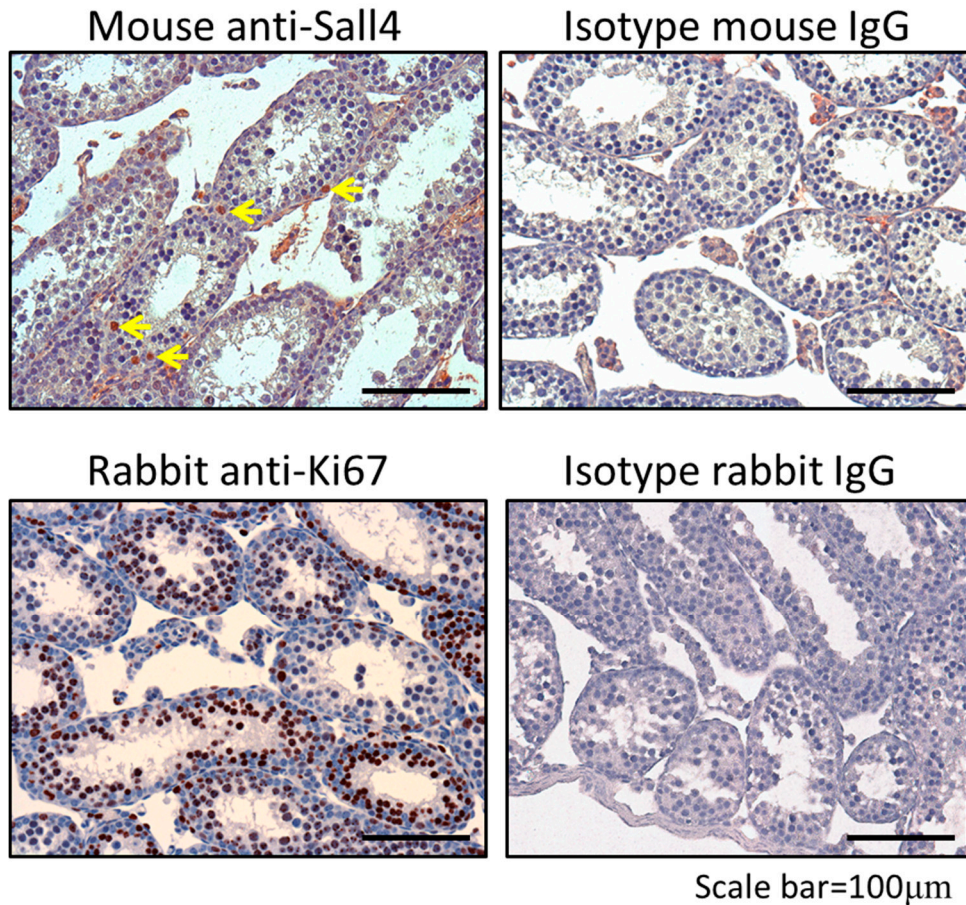

25

26 **Supplementary Figure S3. IHC staining control in mouse testis section.** Mouse  
 27 anti-Sall4 antibody (H00057167-M03, Novus Biologicals) is used to evaluate the  
 28 background signal of mouse testis section when using mouse antibody. The isotype  
 29 mouse IgG control showed no signals inside the seminiferous tubules, but only some  
 30 background in the intratubule regions (right panel). Rabbit IgG control group also  
 31 detects no background (right panel). Sall4 antibody specifically is stained in the nuclei  
 32 of type  $A_{\text{single}}$ -like spermatogonia (left panel, arrow indicated) and MKi67 antibody  
 33 also shows positive signals in the nuclei (left panel), indicating the successful staining  
 34 results.

## Knockdown experiment-Batch 1

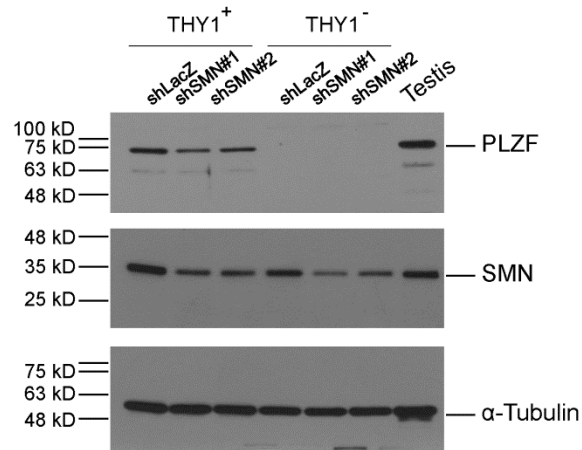

## Knockdown experiment-Batch 2

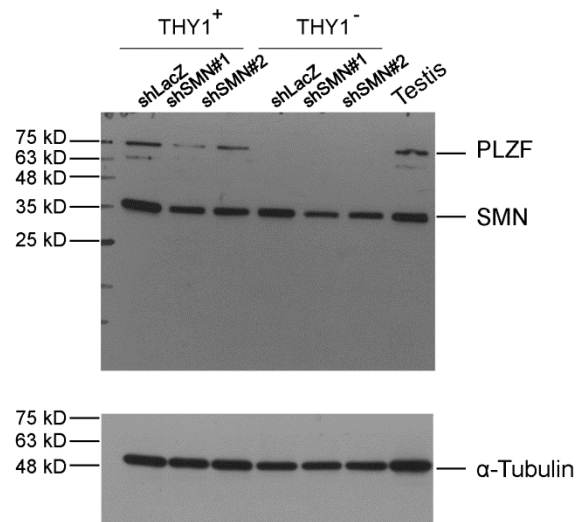

36

37 **Supplementary Figure S4. Original western blots for main figures.** Complete38 western blots of PLZF,  $\alpha$ -Tubulin and SMN expression in SSCs after SMN

39 knockdown shown in Figure 3A for two batches of experiments. The molecular

40 weight standards are shown on the left. Whole testis is used as the positive control for

41 each protein.

42 **Supplementary Table S1. Sequences of primers used for genotyping of SMA**  
 43 **transgenic mice (related to Figure 2) and real-time PCR analysis (related to**  
 44 **Figure 3).**

45

46 Primer sets used for SMA mice genotyping

| For Smn1       | SEQUENCE                  |
|----------------|---------------------------|
| 3' S1          | ATAACACCACCACTCTTACTC     |
| 5' S2          | GTAGCCGTGATGCCATTGTCA     |
| 5' H1          | AGCCTGAAGAACGAGATCAGC     |
| For human SMN2 | SEQUENCE                  |
| 2F             | CGAATCACTTGAGGGCAGGAGTTTG |
| 2B             | AACTGGTGGACATGGCTGTTCATTG |

47

48 Primer sets used for real-time PCR analysis

| TARGET | FORWARD SEQUENCE        | REVERSE SEQUENCE       |
|--------|-------------------------|------------------------|
| Smn1   | GCTCCGTGGACCTCATTTTC    | GGGCCGTTGAATTTTAGACC   |
| Plzf   | GCATTTACTGGCTCATTACAGCG | GTGCGCTTTGTGCCTGAAA    |
| Sall4  | AATGCTGTGCCGAGTTCTTT    | GTGCCAGCTTCTTCAAGTC    |
| Acr1   | CCAGGTTAGGGCAGGAGTATG   | TAACCCACAGGGACCATCACA  |
| Scp3   | TCAGATGCTTCGAGGGTGTG    | CTGGAGCCTTTTCATCAGCAAC |
| Trp53  | GCAACTATGGCTTCCACCTG    | TTATTGAGGGGAGGAGAGTACG |
| Puma   | ACCGCTCCACCTGCCGTCAC    | ACGGGCGACTCTAAGTGCTGC  |
| Bax    | GTGAGCGGCTGCTTGTCT      | GGTCCCGAAGTAGGAGAGGA   |
| Gapdh  | TGGCCTTCCGTGTTCCCTA C   | GAGTTGCTGTTGAAGTCGCA   |

49

50
